## **Quality of life in adolescents with chronic non-traumatic knee pain: An analysis of 323 adolescents with Patellofemoral Pain and Osgood-Schlatter Disease.**

Chris Djurtoft <sup>1,2,X</sup>, Tomer Yona <sup>3,X</sup>, Ewa Maria Roos <sup>4</sup>, Kristian Thorborg <sup>5,6</sup>, Per Hölmich <sup>5,7,8</sup>, Sten Rasmussen <sup>9,10</sup>, Jens Lykkegaard Olesen <sup>1,9</sup>, Michael Skovdal Rathleff <sup>1,2,11</sup>.

### **Affiliations:**

<sup>1</sup> Center for General Practice at Aalborg University, Aalborg, Denmark.

<sup>2</sup> Department of Health Science and Technology, Aalborg University, Denmark.

<sup>3</sup> Department of Biomedical Engineering, Technion, Israel Institute of Technology, Haifa, Israel.

<sup>4</sup> Research Unit for Musculoskeletal Function and Physiotherapy, Center for Muscle and Joint Health, Institute of Sport Science and Clinical Biomechanics, University of Southern Denmark, Odense, Denmark.

<sup>5</sup> Sports Orthopedic Research Center – Copenhagen (SORC-C), Hvidovre, Denmark.

<sup>6</sup> Physical Medicine and Rehabilitation Research-Copenhagen (PMR-C), Hvidovre, Denmark.

<sup>7</sup> Department of Orthopedic Surgery, Copenhagen University Hospital, Hvidovre, Denmark.

<sup>8</sup> Department of Clinical Medicine, University of Copenhagen, Copenhagen, Denmark.

<sup>9</sup> Department of Clinical Medicine, Aalborg University, Aalborg, Denmark.

<sup>10</sup> Department of Orthopedic Surgery, Aalborg University Hospital.

<sup>11</sup> Department of Physiotherapy and Occupational Therapy, Aalborg University Hospital, Aalborg, Denmark.

<sup>X</sup> Shared first authorship.

### **Corresponding author:**

Chris Djurtoft. Center for General Practice at Aalborg University, Fyrkildevej 7, 9220, Aalborg, Denmark; and Department of Health Science and Technology, Faculty of Medicine, Aalborg University.

Email: [cdjurt@dcm.aau.dk](mailto:cdjurt@dcm.aau.dk)

Telephone: +4528257763.

**NOTE: This preprint reports new research that has not been certified by peer review and should not be used to guide clinical practice.**

**Funding:** This study was funded by the Danish Independent Research Foundation (grant DFF-4004-00247) and the Danish Physiotherapists Research Foundation. The authors certify that they have no affiliations with or financial involvement in any organization or entity with a direct financial interest in the subject matter or materials discussed in the article.

**Ethical Approval and Institutional Review Board:** Ethics Committee of North Denmark Region. This study was exempt from a full ethical approval by The North Denmark Region Committee on Health Research Ethics.

**Acknowledgements, financial disclosure, and conflict of interest:** The funders had no role in study design, data collection and analysis, decision to publish, or preparation of the manuscript. All authors certify that they have no affiliations with or involvement in any organization or entity with any financial interest or nonfinancial interest in the subject matter or materials discussed in this manuscript.

**Name of the public trials registry and the registration number:** ClinicalTrials.gov Identifier: NCT02799394, NCT02402673, NCT01438762.

## 1 **Abstract**

2 **Introduction:** We aimed to describe Quality of life (QoL) among adolescents with  
3 Patellofemoral Pain (PFP) and Osgood-Schlatter Disease (OSD) according to the QoL subscale  
4 of The Knee injury and Osteoarthritis Outcome Score (KOOS) and the EuroQol 5-dimensions  
5 (EQ-5D) and to investigate the characteristics associated with QoL.

6 **Methods:** This individual participant analysis included data from three clinical trials on  
7 adolescents diagnosed with PFP or OSD. We relabeled individual data and constructed a single  
8 dataset.

9 **Results:** We included 323 adolescents with PFP or OSD. Total score of KOOS-QoL was  $51 \pm 18$   
10 and total index score for the EQ5D was  $0.67 \pm 0.21$ . KOOS-QoL subscale showed that 59%  
11 reported being aware of their knee problems daily or constantly, 37% reported severe to  
12 extreme lack of confidence in their knees, 27% reported severe to extreme difficulty with their  
13 knees, and 20% reported severely or totally modifying their lifestyle to avoid potentially  
14 damaging activities to their knee. EQ-5D showed that 77% experienced problems with  
15 everyday activities, 47% reported mobility problems, 17% felt worried, sad, or unhappy, and  
16 7% reported problems looking after themselves. Older participants (age 17-19) reported worse  
17 QoL than younger participants. None of the other characteristics were associated with QoL.

18 **Conclusions:** A high proportion of adolescents with chronic non-traumatic knee pain  
19 experience low QoL. More than half were aware of their knee problems at least daily, one in  
20 three reported a severe lack of confidence in their knee, and one in six felt worried, sad, or  
21 unhappy. QoL was lowest among older adolescents.

22 **Key words:** Quality of life; Non-traumatic knee pain; Patellofemoral Pain; Osgood-Schlatter  
23 Disease.

24

25 **Highlights:**

- 26 - One in every three adolescents with PFP or OSD reported a severe lack of confidence  
27 in their knee.
- 28 - Many adolescents reported being sad or worried, and modified their usual activities due  
29 to their knee pain.
- 30 - Clinicians may extend the scope and include pain management strategies to address  
31 psychological perspectives when managing adolescents diagnosed with PFP or OSD.
- 32 - Modifiable targets such as adolescents understanding of pain may be a beneficial  
33 management strategy to consider in rehabilitation for PFP or OSD.

34

35

## 36 **Introduction**

37 Chronic musculoskeletal pain (CMP) affects up to one-third of adolescents (age 10-19) <sup>6,9,34</sup>.  
38 During this critical period in life, pain may have detrimental impact on a child's physical,  
39 emotional, and social functioning <sup>6,8,17</sup>. Non-traumatic knee pain is the most common pain  
40 origin among adolescents, with Patellofemoral Pain (PFP) and Osgood-Schlatter Disease  
41 (OSD) having the highest prevalence <sup>34</sup>. PFP and OSD show similar pain patterns, including  
42 pain in the anterior part of the knee, and are commonly observed among highly active  
43 adolescents <sup>28,35</sup>. PFP and OSD are often seen as self-limiting, but recent evidence shows that  
44 approximately half of the adolescents having knee pain will continue to experience pain after  
45 12 months, and nearly 75% of adolescents will reduce sports participation due to their knee  
46 pain <sup>12,29,32</sup>. The impact of PFP and OSD has significant consequences, as issues extend to basic  
47 functional tasks (running and stair-walking), shorter sleeping time, worse sleep quality, and  
48 worse quality of life (QoL) than their peers without pain <sup>12,22,25,29,32</sup>.

49 A recent individual participants meta-analysis investigating prognostic factors for long-term  
50 outcomes demonstrated that 51% of adolescents with non-traumatic knee pain still report knee  
51 pain after 12 months <sup>12</sup>. Notably, low Health-Related Quality of Life (HRQoL) was one of the  
52 strongest prognostic factors for poor outcomes and the only identified construct that seems  
53 modifiable <sup>12</sup>. Importantly, modifiable risk factors have high clinical value, as they might help  
54 clinicians tailor patient-centered management strategies to enhance rehabilitation success <sup>23</sup>.  
55 However, it is challenging to identify characteristics of predictive value and previous evidence  
56 regarding prognostic factors in adolescents CMP is sparse and inconsistent <sup>12,13,27</sup>.

57 Despite HRQoL has been suggested as an important modifiable prognostic factor, it has  
58 remained unclear which characteristics are associated with this phenomenon in this population  
59 <sup>12,13</sup>. However, QoL is a multidimensional construct that is highly subjective and associated

60 with many aspects in adolescents experiencing CMP, such as stress, loneliness, lower self-  
61 efficacy, and lower self-esteem<sup>16,20,22</sup>. Additionally, identifying ways to manage and improve  
62 QoL was recently ranked as the second highest research priority within CMP<sup>26</sup>, which  
63 emphasizes the need for an increased understanding of what influences QoL in adolescents  
64 diagnosed with PFP or OSD. This will strengthen our knowledge of this phenomenon and  
65 plausibly provide important modifiable targets for current management strategies<sup>27</sup>.

66 Combining individual participants' data from three published original trials on adolescents  
67 with PFP or OSD strengthens statistical power and raises an opportunity to explore what  
68 influences QoL in a larger group of adolescents with the two most common knee conditions.  
69 Therefore, we aimed to 1) describe QoL among adolescents with PFP or OSD according to the  
70 EuroQol 5-dimensions (EQ-5D) and The Knee injury and Osteoarthritis Outcome Score  
71 (KOOS) QoL and 2) to investigate measures of QoL and its association with characteristics in  
72 terms of sports participation, sports activities per week, pain duration, pain intensity, bilateral  
73 knee pain, body mass index (BMI), sex, age, and use of pain medication.

## 74 **Methods**

### 75 **Study Design**

76 Our study is reported in accordance with the STROBE statement<sup>7</sup>. This cross-sectional  
77 explorative study was designed as an individual participant analysis of three previous clinical  
78 trials on adolescents (defined by the World Health Organization (WHO) as the second decade  
79 of life, 10-19 years old<sup>40</sup>) suffering from chronic non-traumatic knee pain. Trials are registered  
80 on [clinicaltrials.gov](https://clinicaltrials.gov) (NCT02799394, NCT02402673, NCT01438762). Signed informed  
81 consent was obtained from all participants and all data were stored on a secure fileshare. This  
82 study was initiated by the original author group of the original publications<sup>28,33,36</sup>.

### 83 **Description of Included Studies**

84 The three studies recruited adolescents diagnosed with PFP or OSD. Two studies included  
85 adolescents with PFP, and one included adolescents with OSD.

## 86 **Patient Demographics and Exposures**

87 All studies collected information on sports participation, sports activities per week, pain  
88 duration, bilateral knee pain, BMI, sex, age, and use of pain medication; additionally, we  
89 collected knee pain intensity (worst pain last week), which was measured using visual analog  
90 scale or numeric pain rating scales.

91 Knee-related QoL was collected by the KOOS questionnaire, which contains five subscales  
92 (pain, symptoms, activity in daily living, function in sport and recreation, and knee-related  
93 QoL) scored from 0 to 100 (worst to best)<sup>4,37</sup>. As this analysis's primary interest was to  
94 describe QoL, we collected data from the KOOS-QoL subscale and individual items  
95 representing the knee-related QoL. Health-related QoL was measured by the EQ-5D in study  
96 one and the EQ-5D youth version in studies two and three. The two versions contain the same  
97 items but slightly different wordings to ensure adolescents below the age of 15 also  
98 comprehend the language used. The Danish weights were used to calculate the EQ-5D index  
99 score (a higher index score equals better QoL)<sup>49</sup>.

## 100 **Data Harmonization and Checking**

101 After acquiring the data, we relabeled individual data sets and recoded them to ensure  
102 consistency and construct a single, merged dataset. The individual patient data validity was  
103 checked by undertaking completeness and consistency checks on individual participant data to  
104 identify missing or invalid (e.g., out of range) items. Missing information or inconsistencies  
105 were checked and rectified, as necessary. The original three studies were powered to explore  
106 the clinical benefits of a specific management strategy. The sample size was thus fixed by the  
107 original studies.

## 108 **Data Analysis**

109 Normally distributed continuous variables are described as mean  $\pm$  standard deviation or 95%  
110 confidence intervals. Non-normally distributed data is presented as median and [range].

111 Categorical variables are expressed as frequencies and percentages.

112 For Knee-related QoL, we calculated the subscale mean score measured by the KOOS-QoL as  
113 recommended where points are summed, converted to percentages of a maximum score and  
114 reversed to a 0-100, worst to best scale<sup>4,37</sup>. In addition, the individual items were divided into  
115 scores from Likert scales<sup>4,37</sup>. All items were answered on a 5-point Likert scale (never/not at  
116 all, monthly/mildly, weekly/moderately, daily/severely, constantly/totally/extreme), yielding  
117 0–4 points, with 0 points representing no difficulty<sup>4,37</sup>. For the QoL measured by the EQ-5D,  
118 we present the index score as a general proxy for QoL, the “health profiles”, and the individual  
119 five items divided into “no problems” or “any problem”, as suggested in the EQ-5D User Guide  
120<sup>49</sup>.

121 Characteristics associated with the KOOS-QoL and EQ-5D are presented using box plots,  
122 displaying the range, median, and interquartile range of scores. The horizontal line represents  
123 the median score, and each box represents the interquartile range. The "whiskers" signify the  
124 lowest and highest score for each group. The circles outside the whiskers represent scores  
125 above the 10th and 90th percentiles, respectively; these scores fall outside the regular range of  
126 values in a distribution and are regarded as outliers. For pragmatic reasons, we divided BMI  
127 into five groups (1: <18.5 - 2: 18.5 to 24.9 - 3: 25 to 29.9 - 4: 30 to 39.9 - and 5:  $\geq$ 40),  
128 according to the description provided by the WHO<sup>5</sup>. No participants had a BMI >40, therefore  
129 this category is not represented. We divided knee pain duration into three groups (1: 0-6 month  
130 - 2: 6-12 month - and 3:  $\geq$ 12 month), as recommended<sup>1</sup>, and lastly, knee pain-intensity was  
131 divided into quartiles (Q1: 0-.25 - Q2: 0.25-0.5 - Q3: 0.5-0.75 and Q4: 0.75-1). All  
132 analyses were carried out using Statistical Package for the Social Sciences (SPSS), version 25.



## 133 Results

### 134 Characteristics of participants

135 A total of 323 participants were included in the dataset; 237 (73%) were girls, 241 (75%)  
136 reported bilateral knee pain, and their ages ranged from 10 to 19 (Table 1). Of all participants,  
137 243 (75%) engaged in sports activities at least twice a week, and 66 (21%) used pain medication  
138 due to knee pain.

139 **Table 1.** Characteristics of included participants and studies. Descriptive data are mean (SD) unless otherwise stated.

|                                       | Study 1<br>Patellofemoral<br>pain (n=121) | Study 2<br>Osgood<br>Schlatter (n=51) | Study 3<br>Patellofemoral<br>Pain (n=151) | All<br>participants<br>(n=323) |
|---------------------------------------|-------------------------------------------|---------------------------------------|-------------------------------------------|--------------------------------|
| Age (years)                           | 17 [15-19]                                | 13 [10-15]                            | 13 [10-14]                                | 14 [10-19]                     |
| Female sex, n (%)                     | 97 (80.2%)                                | 25 (49%)                              | 115 (76.2%)                               | 237 (73.4%)                    |
| Body mass index, (kg/m <sup>2</sup> ) | 21.6 [17.1-32.8]                          | 20.3 [14.7-27.6]                      | 19 [14-28]                                | 19.8 [14-32.8]                 |
| Pain duration (months)                | 39 [2-192]                                | 18 [2-60]                             | 18 [2-78]                                 | 24 [2-192]                     |
| Worst pain last week (VAS/NRS)        | 48 [3-97]                                 | 70 [0-100]                            | 60 [0-100]                                | 55 [0-100]                     |
| Bilateral knee pain, n (%)            | 95 (78.5)                                 | 35 (68.6)                             | 111 (73.5)                                | 241 (74.8)                     |
| Use of pain medication, n (%)         | 24 (19.8)                                 | 6 (11.8)                              | 36 (23.8)                                 | 66 (20.6)                      |
| Sport activities (yes), n (%)         | 81 (66.9)                                 | 38 (74.5)                             | 124 (82.1)                                | 243 (75.2)                     |
| Sport activities per week             | 2 [0-7]                                   | 2 [0-6]                               | 2 [0-7]                                   | 2 [0-7]                        |

140 Continuous variables are presented as median and [range]. Nominal variables are presented as number (percentages).  
141 Abbreviations; SD, Standard deviation; NRS, numeric rating scale; VAS, visual analogue scale.

### 142 KOOS-QoL subscale scores

143 KOOS-QoL subscale score for the 323 participants was 51±18. The most prominent item of  
144 KOOS-QoL was awareness of the knee problem, with 191 (59%) reporting daily or constant  
145 awareness (Table 2). Adolescents that reported severe to extreme lack of confidence in their  
146 knees were 119 (36%) and 87 (27%) reported severe to extreme difficulty with their knees.  
147 Lastly, 64 (20%) reported severely or totally modifying their lifestyle to avoid potentially  
148 damaging activities.

TABLE 2. Participants Knee injury and Osteoarthritis Outcome Score (KOOS) QoL subscale

|                                                                                                    | Study 1 (n=121)<br>Patellofemoral pain | Study 2 (n=51)<br>Osgood Schlatter | Study 3 (n=144)<br>Patellofemoral Pain | All participants<br>(n=323) |
|----------------------------------------------------------------------------------------------------|----------------------------------------|------------------------------------|----------------------------------------|-----------------------------|
| <b>Q1. How often are you aware of your knee problem?</b>                                           |                                        |                                    |                                        |                             |
| Never                                                                                              | 2 (1.7)                                | 1 (2)                              | 0                                      | 3 (0.9)                     |
| Monthly                                                                                            | 7 (5.8)                                | 1 (2)                              | 3 (2)                                  | 11 (3.4)                    |
| Weekly                                                                                             | 62 (51.2)                              | 9 (17.6)                           | 40 (26.5)                              | 111 (34.4)                  |
| Daily                                                                                              | 47 (38.8)                              | 32 (62.7)                          | 87 (57.6)                              | 166 (51.4)                  |
| Constantly                                                                                         | 3 (2.5)                                | 8 (15.7)                           | 14 (9.3)                               | 25 (7.7)                    |
| Missing                                                                                            | 0                                      | 0                                  | 7 (4.6)                                | 7 (2.2)                     |
| <b>Q2. Have you modified your lifestyle to avoid potentially damaging activities to your knee?</b> |                                        |                                    |                                        |                             |
| Not at all                                                                                         | 40 (33.1)                              | 7 (13.7)                           | 36 (26.8)                              | 83 (25.7)                   |
| Mildly                                                                                             | 53 (43.8)                              | 15 (29.4)                          | 54 (35.8)                              | 122 (37.8)                  |
| Moderately                                                                                         | 9 (7.4)                                | 14 (27.5)                          | 24 (15.9)                              | 47 (14.6)                   |
| Severely                                                                                           | 15 (12.4)                              | 10 (19.6)                          | 25 (16.6)                              | 50 (15.5)                   |
| Totally                                                                                            | 4 (3.3)                                | 5 (9.8)                            | 5 (3.3)                                | 14 (4.3)                    |
| Missing                                                                                            | 0                                      | 0                                  | 7 (4.6)                                | 7 (2.2)                     |
| <b>Q3. How much are you troubled with lack of confidence in your knee?</b>                         |                                        |                                    |                                        |                             |
| Not at all                                                                                         | 7 (5.8)                                | 4 (7.8)                            | 27 (17.9)                              | 38 (11.8)                   |
| Mildly                                                                                             | 33 (27.3)                              | 12 (23.5)                          | 28 (18.5)                              | 73 (22.6)                   |
| Moderately                                                                                         | 35 (28.9)                              | 12 (23.5)                          | 39 (25.8)                              | 86 (26.6)                   |
| Severely                                                                                           | 43 (35.3)                              | 21 (41.2)                          | 41 (27.2)                              | 105 (32.5)                  |
| Extremely                                                                                          | 3 (2.5)                                | 2 (3.9)                            | 9 (6)                                  | 14 (4.3)                    |
| Missing                                                                                            | 0                                      | 0                                  | 7 (4.6)                                | 7 (2.2)                     |
| <b>Q4. In general, how much difficulty do you have with your knee?</b>                             |                                        |                                    |                                        |                             |
| None                                                                                               | 4 (3.3)                                | 4 (7.8)                            | 10 (6.6)                               | 18 (5.6)                    |
| Mild                                                                                               | 36 (29.8)                              | 5 (9.8)                            | 21 (13.9)                              | 62 (19.2)                   |
| Moderate                                                                                           | 62 (51.2)                              | 17 (33.3)                          | 70 (46.4)                              | 149 (46.1)                  |
| Severe                                                                                             | 18 (14.9)                              | 24 (47.1)                          | 39 (25.8)                              | 81 (25.1)                   |
| Extreme                                                                                            | 1 (0.8)                                | 1 (2)                              | 4 (2.6)                                | 6 (1.9)                     |
| Missing                                                                                            | 0                                      | 0                                  | 7 (4.6)                                | 7 (2.2)                     |
| <b>KOOS QoL subscale Mean Score (Mean, SD)</b>                                                     | 55±16                                  | 43±16                              | 51±19                                  | 51.4±18                     |

Abbreviations; KOOS, Knee injury and Osteoarthritis Outcome Score; SD, Standard deviation; QoL, Quality of life.

151 **EQ-5D Scores**

152 The total index score of the EQ5D was  $0.67 \pm 0.21$ . Pain or discomfort was the most affected item on  
 153 EQ-5D (Table 3), with 297 (92%) reporting problems. A total of 251 (77%) participants reported  
 154 problems with usual activities and 153 (47%) had problems with mobility. Feeling worried, sad, or  
 155 unhappy was noted in 55 (17%) participants, and 23 (7%) reported having problems looking after  
 156 themselves.

157 **TABLE 3.** EQ-5D data, showing frequencies and proportions by dimension and severity level.

|                                        | Study 1 (n=121) | Study 2 (n=51) | Study 3 (n=151) | All participants (n=323) |
|----------------------------------------|-----------------|----------------|-----------------|--------------------------|
| <b>Mobility</b>                        |                 |                |                 |                          |
| No problems                            | 70 (57.9)       | 25 (49)        | 68 (45)         | 163 (50.5)               |
| Some problems                          | 51 (42.1)       | 26 (51)        | 68 (45)         | 145 (44.9)               |
| A lot of problems                      | 0               | 0              | 8 (5.3)         | 8 (2.5)                  |
| Missing                                | 0               | 0              | 7 (4.6)         | 7 (2.2)                  |
| <b>Looking After Myself</b>            |                 |                |                 |                          |
| No problems                            | 118 (97.5)      | 45 (88.2)      | 130 (86.1)      | 293 (90.7)               |
| Some problems                          | 3 (2.5)         | 6 (11.8)       | 14 (.93)        | 23 (7.1)                 |
| A lot of problems                      | 0               | 0              | 0               | 0                        |
| Missing                                | 0               | 0              | 7 (4.6)         | 7 (2.2)                  |
| <b>Doing Usual Activities</b>          |                 |                |                 |                          |
| No problems                            | 28 (23.1)       | 7 (13.7)       | 31 (20.5)       | 66 (20.4)                |
| Some problems                          | 90 (74.4)       | 36 (70.6)      | 91 (60.3)       | 217 (67.2)               |
| A lot of problems                      | 3 (2.5)         | 8 (15.7)       | 22 (14.6)       | 33 (10.2)                |
| Missing                                | 0               | 0              | 7 (4.6)         | 7 (2.2)                  |
| <b>Having Pain or Discomfort</b>       |                 |                |                 |                          |
| No problems                            | 9 (7.4)         | 1 (2)          | 9 (6)           | 19 (5.9)                 |
| Some problems                          | 107 (88.4)      | 38 (74.5)      | 98 (64.9)       | 243 (75.2)               |
| A lot of problems                      | 5 (4.1)         | 12 (23.5)      | 37 (24.5)       | 54 (16.7)                |
| Missing                                | 0               | 0              | 7 (4.6)         | 7 (2.2)                  |
| <b>Feeling Worried, Sad or Unhappy</b> |                 |                |                 |                          |
| No problems                            | 106 (87.6)      | 40 (78.4)      | 115 (76.2)      | 261 (80.8)               |
| Some problems                          | 14 (11.6)       | 9 (17.6)       | 26 (17.2)       | 49 (15.2)                |
| A lot of problems                      | 1 (0.8)         | 2 (3.9)        | 3 (2)           | 6 (1.9)                  |
| Missing                                | 0               | 0              | 7 (4.6)         | 7 (2.2)                  |
| <b>EQ5D Index-score (Mean, SD)</b>     | 0.74 (0.12)     | 0.63 (0.23)    | 0.62 (0.25)     | 0.67 (0.21)              |

158 Abbreviations; EQ5D, EuroQoL 5-dimensions; SD, Standard deviation.

159 **Characteristics associated with QoL.**

160 Based on visual interpretation, we examined the association between measures of QoL and included  
 161 variables. Visual inspection showed no linear association between weekly sports participation and  
 162 KOOS-QoL or EQ-5D scores (Figure 1). Adolescents participating in little or no sport and those

163 participating six times weekly or more reported the lowest QoL. In addition, adolescents reported  
164 being sports active had equal level of QoL as those who did not participate in sports. Visual inspection  
165 revealed no association between knee pain intensity and KOOS-QoL or EQ-5D scores. For pain  
166 duration, no association was observed at any time-points. Adolescents reporting use of pain  
167 medication did not score lower quality of life compared to adolescents reporting no use of pain  
168 medication.

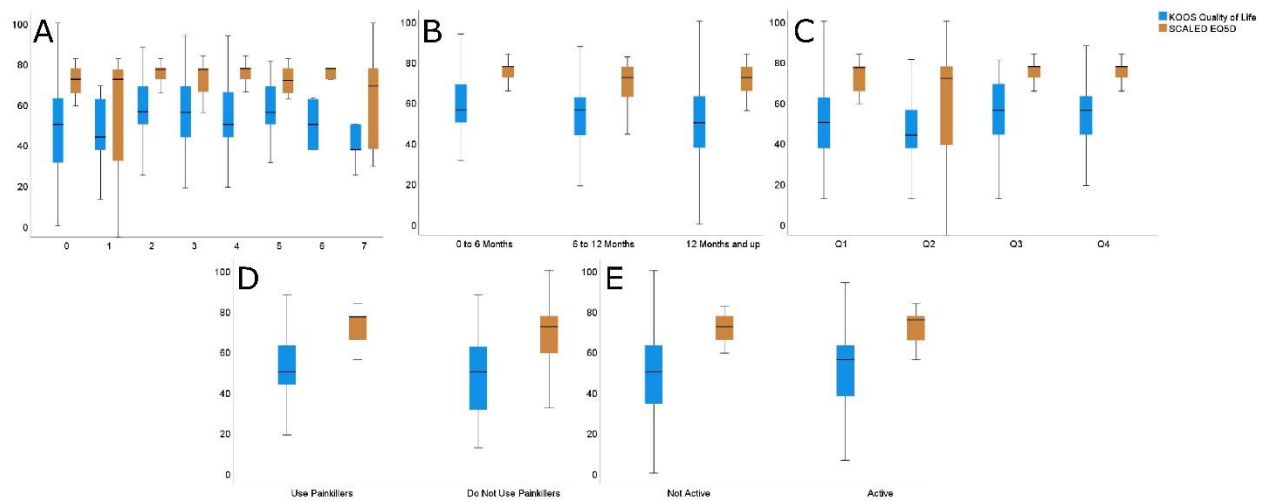

169

170 **FIGURE 1.** EQ-5D-Y index and KOOS QoL scores by sport participation per week. The error bars represent the 95% confidence  
171 intervals. Abbreviations; EQ5D, EuroQol 5-dimensions; KOOS, Knee injury and Osteoarthritis Outcome Score; Q, Quartiles; QoL,  
172 Quality of life. A= Sports activities per week; B= Knee pain duration; C= Knee pain intensity; D= Pain medication; E= Sports  
173 participation.

174 Sex was not associated with lower QoL, and older participants (age 17-19) reported lower QoL than  
175 younger participants (Figure 2). Adolescents having bilateral knee pain reported similar levels of QoL  
176 as adolescents having unilateral knee pain, and lastly, for BMI, we observed no difference in  
177 perceived QoL between any of the predefined groups.

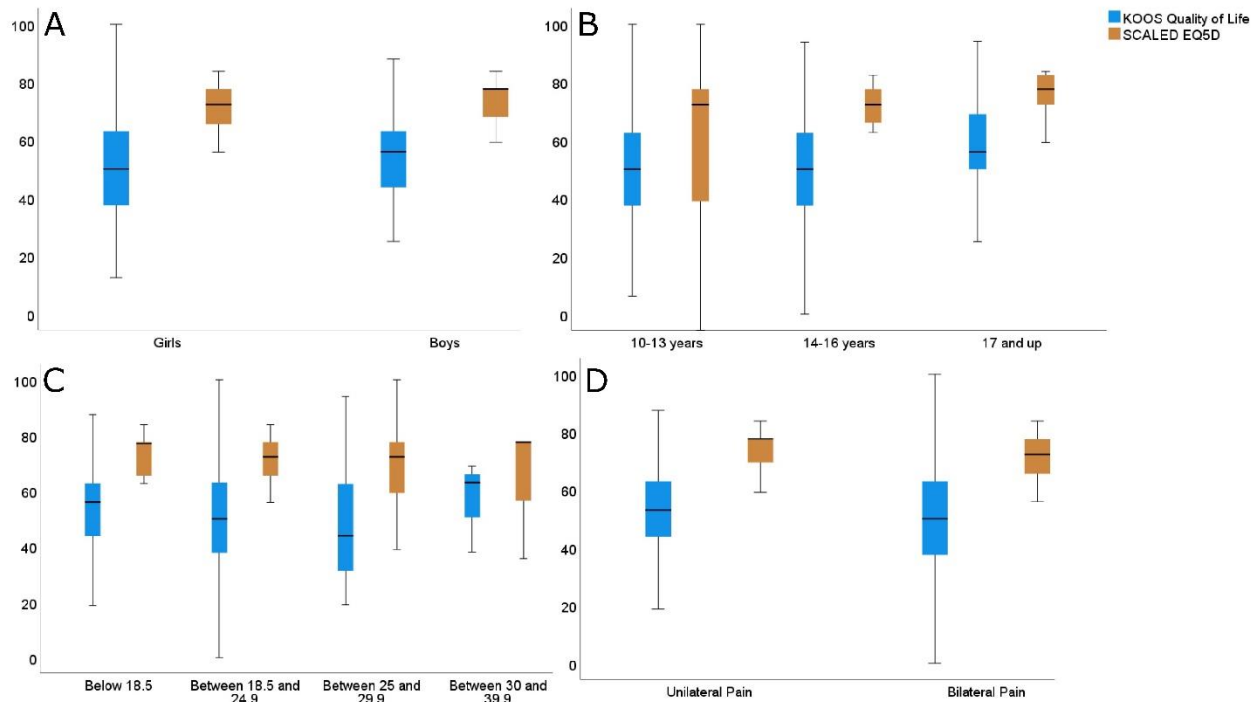

178

179 **FIGURE 2.** EQ-5D-Y index and KOOS QoL scores by gender. The error bars represent the 95% confidence intervals. Abbreviations;  
180 EQ5D, EuroQol 5-dimensions; KOOS, Knee injury and Osteoarthritis Outcome Score; QoL, Quality of life; A= Sex; B= Age; C=  
181 Body mass index (BMI); D= Bilateral knee pain.

182

## 183 Discussion

184 We found that many adolescents reported a lack of confidence in their knee, often felt sad or worried,  
185 and modified their usual activities due to their knee pain. Our findings contribute to the growing  
186 evidence base that PFP and OSD are associated with negative psychological impact. This may  
187 contribute to the complex experience of CMP<sup>17,42</sup>. These findings extend our current knowledge and  
188 highlight the negative impact chronic non-traumatic knee pain can have on adolescents. This may  
189 prompt clinicians with new targets during rehabilitation, beyond the functional deficits these young  
190 individuals diagnosed with PFP or OSD may experience.

## 191 Explanation of Findings

192 Of 323 adolescents, 77% changed their usual activities to avoid what they perceived as damaging to  
193 their knees, and 36% reported severe to extreme lack of confidence in their knees. Our findings are

194 consistent with a previous study among adolescents diagnosed with either PFP or OSD which showed  
195 more than 50% reported their reduced sports participation, due to “*pain*”, and “*I am afraid to damage*  
196 *my knee*”<sup>35</sup>. Adolescents understanding of their pain condition may have a direct impact on how they  
197 interpret and manage their pain<sup>8,17,42</sup>. Some adolescents with a lived experience of CMP ascribe  
198 positive changes in understanding of pain (i.e., pain as non-threatening) as important contributors  
199 towards their recovery<sup>8,15,17</sup>. Johansen et al. recently showed that the individual perceptions of ‘why  
200 do I have pain’ (i.e., functional theories) are strong drivers of behavior in young adults with non-  
201 traumatic knee pain underlining that knowledge about their condition is important<sup>14</sup>. Adolescents  
202 with more knowledge about causes of their pain, also showed increased ability to accept, cope and  
203 control their knee pain<sup>14</sup>. This helped them to adjust their perceived QoL and may explain why QoL  
204 is associated with prognosis<sup>12,14,17</sup>. Combined with our findings, it might suggest that these  
205 psychological aspects, such as negative beliefs about pain play an important role in rehabilitation for  
206 adolescents.

207 Our findings raise important questions about current rehabilitation for adolescents experiencing  
208 chronic non-traumatic knee pain. Traditionally, PFP and OSD management has focused on physical  
209 interventions, such as exercise, resistance training, taping, and stretching<sup>3,41,47,48</sup>. However, it is  
210 unclear if these interventions target the QoL dimensions we have identified<sup>6,24,48</sup>. Previous research  
211 on adolescents with non-traumatic knee pain show that over the course of treatment QoL does not  
212 improve to the same extent as pain and function<sup>28,30,31,33</sup>. This opens up the question if we need to  
213 reconsider content and focus during rehabilitation of adolescents with PFP or OSD<sup>2,6</sup>. Our findings  
214 suggest evidence-based management for adolescents with PFP and OSD may benefit from an even  
215 broader range of modifiable targets, such as understanding of pain, low confidence, negative  
216 emotions, and fear of damaging the knees to improve QoL and potentially their prognosis.  
217 Nonetheless, we cannot exclude any possibilities that other relevant contributing dimensions may  
218 play a significant role during rehabilitation since these were not measured. The cross-sectional design

219 of this study prevents us from both causal conclusions and the longitudinal understanding; we urge  
220 future studies to examine this further.

221 In the current study, we observed that over half (59%) of adolescents with PFP or OSD reported daily  
222 or constant awareness of their knee pain and almost one fifth felt worried, sad, or unhappy. However,  
223 these negative beliefs and important dimensions of QoL were not associated with duration of knee  
224 pain, although this being a well-known determinant for prognosis <sup>12</sup>. Measures of QoL have been  
225 suggested as a proxy for current state in life in relation to self-evaluated health and therefore, prone  
226 to significant change in meaning over time <sup>39,45</sup>. Adolescents' preferences and goals change over the  
227 course of time and are highly dependent of the perceived stage of rehabilitation <sup>14,15,46</sup>. Sprangers and  
228 Schwartz describe this phenomenon as *response shift*; a result of changing personal norms, values, or  
229 conceptualizing on QoL throughout the course of a condition <sup>43,45</sup>. The response shift illustrates  
230 individual capacity to adapt to their context (i.e., acceptance of pain), shifting focus away from one  
231 cannot (for now), to what they can do to exert control of pain in their current situation <sup>43,45</sup>. This aligns  
232 with qualitative evidence where some adolescents with CMP ascribe that enhanced knowledge of  
233 pain legitimize self-management behaviors that makes it easier to accept limitations, justify actions  
234 to other peers, prioritize new life goals and thereby accomplish satisfactory level of perceived QoL  
235 <sup>8,14,15,38</sup>. The temporal and adaptive nature of this phenomenon may explain why perceived QoL  
236 differs from other outcomes in the long-term <sup>45</sup>.

237 We did not observe any strong association between measures of QoL and characteristics, only older  
238 adolescents ( $\geq 17$  years) reported lower QoL compared with younger adolescents. However, a  
239 common theme across our results were the large data variability, which emphasizes the heterogeneity  
240 of self-reported QoL in this population. This is consistent with previous research on traumatic knee  
241 injuries in young individuals <sup>44</sup>. They showed that QoL was very variable and that several individual  
242 psychological, social, and contextual dimensions related to QoL influenced and changed differently

243 across all staged during rehabilitation <sup>44</sup>. These issues reflect the diverse impact and needs during  
244 rehabilitation these young individuals may experience. Adolescents' diverse clinical presentation  
245 may provide a plausible explanation for current insufficient evidence of recommending specific  
246 treatments in the context of non-traumatic knee pain <sup>24,48</sup>. It has been suggested that current  
247 management for adolescents CMP may benefit from higher degree of personalization that fit into  
248 each individual context <sup>6,21</sup>. The current study adds new insights into this field of adolescents suffering  
249 from PFP or OSD. Our results may help tackle some of the challenges clinicians face when tailoring  
250 rehabilitation to fit individual adolescent.

### 251 **Clinical Implications**

252 Our findings may help increase clinicians' awareness of psychological perspectives in adolescents  
253 diagnosed with PFP or OSD. It is our clear recommendation that clinicians keep our results in mind  
254 when providing personalized evidence-based pain assessment and subsequent management for  
255 adolescents with PFP or OSD. There may be unique management options to consider in clinical  
256 settings. Future management might benefit from clinicians addressing the whole biopsychosocial  
257 perspective tailored to the individual's context <sup>6,24,48</sup>. Lancet Child & Adolescent Health Commission  
258 emphasized the importance of intervening earlier to ensure young people get the proper management  
259 at the right time. Early identification of these modifiable targets may help clinicians tailor  
260 personalized rehabilitation to optimize relevant outcomes, such as adolescents perceived QoL <sup>6</sup>.

### 261 **Strength and limitations**

262 Strengths of our study include the large sample, the broad age range of participants, and the use of  
263 two complementary measures of QoL; one knee-specific and one generic measure which yielded  
264 similar results <sup>11</sup>. The following limitations should also be considered in interpreting the findings of  
265 our study. First, our results rely on a cross-sectional explorative study design. Therefore, our results  
266 should be seen as hypotheses generating rather than proving any causal or temporal relationships



267 between measures of QoL and characteristics. Second, recent studies emphasize that current measures  
268 of QoL are prone to conceptual and methodological challenges and may lack validity of the target  
269 construct<sup>10,11,19</sup>. This means our data must be interpreted cautiously as we may have missed important  
270 dimensions of QoL<sup>11,18,19,45</sup>.

## 271 **Future Research**

272 Using qualitative methods, future studies should explore the questions of QoL to capture the whole  
273 experience of chronic non-traumatic knee pain and understand how and why changes in perception  
274 occur over time. We encourage future studies to use a longitudinal design to understand how QoL  
275 can be modified and explore co-occurring dimensions associated with QoL as well as changes in  
276 QoL. This will provide essential knowledge to further understand the complexity of living well with  
277 (or despite) the knee pain and potentially develop new management strategies for these individuals.

## 278 **Conclusion**

279 A high proportion of adolescents with chronic non-traumatic knee pain experience low QoL. More  
280 than half were aware of their knee problems at least daily, one in three reported a severe lack of  
281 confidence in their knee, and one in six felt worried, sad, or unhappy. Boys reported lower QoL than  
282 girls and QoL were lowest among older adolescents. These results may inform relevant targets in  
283 rehabilitation for adolescent non-traumatic knee pain.

284

285

## 286 **References**

- 287 1. Barton CJ, de Oliveira Silva D, Morton S, Collins NJ, Rathleff MS, Vicenzino B, van  
288 Middelkoop M, Crossley KM, Callaghan MJ, Selfe J, Holden S, Lack S, Macri EM, Bazett-  
289 Jones DM, Earl-Boehm JE, Riel H, Powers CM, Davis IS, Morrissey D: REPORT-PFP: a  
290 consensus from the International Patellofemoral Research Network to improve REPORTing  
291 of quantitative PatelloFemoral Pain studies. *Br J Sports Med* 55:1135, 2021.
- 292 2. Birnie KA, Ouellette C, Amaral T do, Stinson JN: Mapping the evidence and gaps of  
293 interventions for pediatric chronic pain to inform policy, research, and practice: A systematic  
294 review and quality assessment of systematic reviews. *Can J Pain* 4:129–48, 2020.
- 295 3. Ciatawi K, Dusak IWS: Osgood-Schlatter disease: a review of current diagnosis and  
296 management. *Curr Orthop Pract* 33:, 2022.
- 297 4. Collins NJ, Misra D, Felson DT, Crossley KM, Roos EM: Measures of knee function:  
298 International Knee Documentation Committee (IKDC) Subjective Knee Evaluation Form,  
299 Knee Injury and Osteoarthritis Outcome Score (KOOS), Knee Injury and Osteoarthritis  
300 Outcome Score Physical Function Short Form (KOOS-PS), Knee Outcome Survey Activities  
301 of Daily Living Scale (KOS-ADL), Lysholm Knee Scoring Scale, Oxford Knee Score  
302 (OKS), Western Ontario and McMaster Universities Osteoarthritis Index (WOMAC),  
303 Activity Rating Scale (ARS), and Tegner Activity Score (TAS). *Arthritis Care Res*  
304 (Hoboken) John Wiley & Sons, Ltd; 63:S208–28, 2011.
- 305 5. de Onis M, Onyango AW, Borghi E, Siyam A, Nishida C, Siekmann J: Development of a  
306 WHO growth reference for school-aged children and adolescents. *Bull World Health Organ*  
307 85:660–7, 2007.
- 308 6. Eccleston C, Fisher E, Howard RF, Slater RC, Forgeron P, Palermo TM, Birnie KA,  
309 Anderson BJ, Chambers CT, Crombez G, Ljungman G, Jordan I, Jordan Z, Roberts C,  
310 Schechter NL, Sieberg CB, Tibboel D, Walker SM, Wilkinson D, Wood C: Delivering  
311 transformative action in paediatric pain: a Lancet Child & Adolescent Health Commission.  
312 *Lancet Child Adolesc Health* , 2020.
- 313 7. Elm E von, Altman DG, Egger M, Pocock SJ, Gøtzsche PC, Vandenbroucke JP:  
314 Strengthening the reporting of observational studies in epidemiology (STROBE) statement:  
315 guidelines for reporting observational studies. *BMJ* 335:806, 2007.
- 316 8. Fegran L, Johannessen B, Ludvigsen MS, Westergren T, Høie M, Slettebø Å, Rohde G,  
317 Helseth S, Haraldstad K: Experiences of a non-clinical set of adolescents and young adults  
318 living with persistent pain: a qualitative metasynthesis. *BMJ Open* 11:e043776, 2021.
- 319 9. Fuglkjær S, Dissing KB, Hestbæk L: Prevalence and incidence of musculoskeletal extremity  
320 complaints in children and adolescents. A systematic review. *BMC Musculoskelet Disord*  
321 18:418, 2017.
- 322 10. Hansen CF, Jensen J, Odgaard A, Siersma V, Comins JD, Brodersen J, Krogsgaard MR:  
323 Four of five frequently used orthopedic PROMs possess inadequate content validity: a  
324 COSMIN evaluation of the mHHS, HAGOS, IKDC-SKF, KOOS and KNEES-ACL. *Knee*  
325 *Surgery, Sports Traumatology, Arthroscopy* 30:3602–15, 2022.

- 326 11. Haraldstad K, Wahl A, Andenæs R, Andersen JR, Andersen MH, Beisland E, Borge CR,  
327 Engebretsen E, Eisemann M, Halvorsrud L, Hanssen TA, Haugstvedt A, Haugland T,  
328 Johansen VA, Larsen MH, Løvereide L, Løyland B, Kvarme LG, Moons P, Norekvål TM,  
329 Ribu L, Rohde GE, Urstad KH, Helseth S, network the L: A systematic review of quality of  
330 life research in medicine and health sciences. *Quality of Life Research* 28:2641–50, 2019.
- 331 12. Holden S, Kasza J, Winters M, van Middelkoop M, Rathleff MS, Group AKH: Prognostic  
332 factors for adolescent knee pain: an individual participant data meta-analysis of 1281  
333 patients. *Pain* 162:, 2021.
- 334 13. Huguet A, Tougas ME, Hayden J, McGrath PJ, Stinson JN, Chambers CT: Systematic  
335 review with meta-analysis of childhood and adolescent risk and prognostic factors for  
336 musculoskeletal pain. *Pain* 157:2640–56, 2016.
- 337 14. Johansen SK, Holden S, Pourbordbari N, Jensen MB, Thomsen JL, Rathleff MS:  
338 PAINSTORIES: Exploring the Temporal Developments in the Challenges, Barriers, and  
339 Self-Management Needs of Adolescents with Longstanding Knee Pain: A Qualitative,  
340 Retrospective Interview Study with Young Adults Experiencing Knee Pain Since  
341 Adolescence. *J Pain Elsevier*; 23:577–94, 2022.
- 342 15. Joslin R, Donovan-Hall M, Roberts L: Exploring the Outcomes That Matter Most to Young  
343 People Treated for Chronic Pain: A Qualitative Study. *Children (Basel)* 8:, 2021.
- 344 16. Karimi M, Brazier J: Health, Health-Related Quality of Life, and Quality of Life: What is the  
345 Difference? *Pharmacoeconomics* 34:645–9, 2016.
- 346 17. Khanom S, McDonagh JE, Briggs M, Bakir E, McBeth J: Adolescents' experiences of  
347 fluctuating pain in musculoskeletal disorders: a qualitative systematic review and thematic  
348 synthesis. *BMC Musculoskelet Disord* 21:645, 2020.
- 349 18. Krogsgaard MR, Hansen CF: Patient-reported outcome measures: it is time for authors,  
350 reviewers, journal editors and health care strategists to take sufficient responsibility. *Knee  
351 Surgery, Sports Traumatology, Arthroscopy* 30:3589–93, 2022.
- 352 19. Le CY, Truong LK, Holt CJ, Filbay SR, Dennett L, Johnson JA, Emery CA, Whittaker JL:  
353 Searching for the Holy Grail: A Systematic Review of Health-Related Quality of Life  
354 Measures for Active Youth. *Journal of Orthopaedic & Sports Physical Therapy Journal of  
355 Orthopaedic & Sports Physical Therapy*; 51:478–91, 2021.
- 356 20. Losada-Puente L, Araújo AM, Muñoz-Cantero JM: A Systematic Review of the Assessment  
357 of Quality of Life in Adolescents. *Soc Indic Res* 147:1039–57, 2020.
- 358 21. McCracken LM, Yu L, Vowles KE: New generation psychological treatments in chronic  
359 pain. *BMJ* 376:e057212, 2022.
- 360 22. Mikkelsen HT, Haraldstad K, Helseth S, Skarstein S, Småstuen MC, Rohde G: Pain and  
361 health-related quality of life in adolescents and the mediating role of self-esteem and self-  
362 efficacy: a cross-sectional study including adolescents and parents. *BMC Psychol* 9:128,  
363 2021.

- 364 23. Murillo C, Vo T-T, Vansteelandt S, Harrison LE, Cagnie B, Coppeters I, Chys M, Timmers  
365 I, Meeus M: How do psychologically based interventions for chronic musculoskeletal pain  
366 work? A systematic review and meta-analysis of specific moderators and mediators of  
367 treatment. *Clin Psychol Rev* 94:102160, 2022.
- 368 24. Neal BS, Bartholomew C, Barton CJ, Morrissey D, Lack SD: Six Treatments Have Positive  
369 Effects at 3 Months for People With Patellofemoral Pain: A Systematic Review With Meta-  
370 analysis. *J Orthop Sports Phys Ther* 52:750–68, 2022.
- 371 25. Palermo TM, Law E, Churchill SS, Walker A: Longitudinal Course and Impact of Insomnia  
372 Symptoms in Adolescents With and Without Chronic Pain. *J Pain Elsevier*; 13:1099–106,  
373 2012.
- 374 26. Paskins Z, Farmer CE, Manning F, Andersson DA, Barlow T, Bishop FL, Brown CA, Clark  
375 A, Clark EM, Dulake D, Gulati M, le Maitre CL, Jones RK, Loughlin J, Mason DJ,  
376 McCarron M, Millar NL, Pandit H, Peat G, Richardson SM, Salt EJ, Taylor EJ, Troeberg L,  
377 Wilcox RK, Wise E, Wilkinson C, Watt FE: Research priorities to reduce the impact of  
378 musculoskeletal disorders: a priority setting exercise with the child health and nutrition  
379 research initiative method. *Lancet Rheumatol Elsevier*; , 2022.
- 380 27. Pate JW, Hancock MJ, Hush JM, Gray K, Pounder M, Pacey V: Prognostic factors for pain  
381 and functional disability in children and adolescents with persisting pain: A systematic  
382 review and meta-analysis. *European Journal of Pain John Wiley & Sons, Ltd*; 24:722–41,  
383 2020.
- 384 28. Rathleff MS, Graven-Nielsen T, Hölmich P, Winiarski L, Krommes K, Holden S, Thorborg  
385 K: Activity Modification and Load Management of Adolescents With Patellofemoral Pain: A  
386 Prospective Intervention Study Including 151 Adolescents. *Am J Sports Med SAGE*  
387 *Publications Inc STM*; 47:1629–37, 2019.
- 388 29. Rathleff MS, Holden S, Straszek CL, Olesen JL, Jensen MB, Roos EM: Five-year prognosis  
389 and impact of adolescent knee pain: a prospective population-based cohort study of 504  
390 adolescents in Denmark. *BMJ Open* 9:e024113, 2019.
- 391 30. Rathleff MS, Mølgaard CM, Fredberg U, Kaalund S, Andersen KB, Jensen TT, Aaskov S,  
392 Olesen JL: High-load strength training improves outcome in patients with plantar fasciitis: A  
393 randomized controlled trial with 12-month follow-up. *Scand J Med Sci Sports* 25:e292-300,  
394 2015.
- 395 31. Rathleff MS, Rathleff CR, Holden S, Thorborg K, Olesen JL: Exercise therapy, patient  
396 education, and patellar taping in the treatment of adolescents with patellofemoral pain: a  
397 prospective pilot study with 6 months follow-up. *Pilot Feasibility Stud* 4:73, 2018.
- 398 32. Rathleff MS, Rathleff CR, Olesen JL, Rasmussen S, Roos EM: Is Knee Pain During  
399 Adolescence a Self-limiting Condition?: Prognosis of Patellofemoral Pain and Other Types  
400 of Knee Pain. *Am J Sports Med SAGE Publications Inc STM*; 44:1165–71, 2016.
- 401 33. Rathleff MS, Roos EM, Olesen JL, Rasmussen S: Exercise during school hours when added  
402 to patient education improves outcome for 2 years in adolescent patellofemoral pain: a  
403 cluster randomised trial. *Br J Sports Med* 49:406, 2015.

- 404 34. Rathleff MS, Roos EM, Olesen JL, Rasmussen S: High prevalence of daily and multi-site  
405 pain – a cross-sectional population-based study among 3000 Danish adolescents. *BMC*  
406 *Pediatr* 13:191, 2013.
- 407 35. Rathleff MS, Winiarski L, Krommes K, Graven-Nielsen T, Hölmich P, Olesen JL, Holden S,  
408 Thorborg K: Pain, Sports Participation, and Physical Function in Adolescents With  
409 Patellofemoral Pain and Osgood-Schlatter Disease: A Matched Cross-sectional Study.  
410 *Journal of Orthopaedic & Sports Physical Therapy Journal of Orthopaedic & Sports Physical*  
411 *Therapy*; 50:149–57, 2020.
- 412 36. Rathleff MS, Winiarski LM, Krommes K, Graven-Nielsen T, Hölmich P, Olesen JL, Holden  
413 S, Thorborg K: Activity Modification and Knee Strengthening for Osgood-Schlatter Disease:  
414 A Prospective Cohort Study. *Orthop J Sports Med* 8:, 2020.
- 415 37. Roos EM, Roos HP, Lohmander LS, Ekdahl C, Beynnon BD: Knee Injury and Osteoarthritis  
416 Outcome Score (KOOS)—Development of a Self-Administered Outcome Measure. *Journal*  
417 *of Orthopaedic & Sports Physical Therapy Journal of Orthopaedic & Sports Physical*  
418 *Therapy*; 28:88–96, 1998.
- 419 38. Ruskin D, Harris L, Stinson J, Kohut SA, Walker K, McCarthy E: “I Learned to Let Go of  
420 My Pain”. The Effects of Mindfulness Meditation on Adolescents with Chronic Pain: An  
421 Analysis of Participants’ Treatment Experience. *Children (Basel)* 4:, 2017.
- 422 39. Schwartz CE, Rapkin BD: Reconsidering the psychometrics of quality of life assessment in  
423 light of response shift and appraisal. *Health Qual Life Outcomes* 2:16, 2004.
- 424 40. Singh JA, Siddiqi M, Parameshwar P, Chandra-Mouli V: World Health Organization  
425 Guidance on Ethical Considerations in Planning and Reviewing Research Studies on Sexual  
426 and Reproductive Health in Adolescents. *J Adolesc Health* 64:427–9, 2019.
- 427 41. Smith BE, Hendrick P, Bateman M, Moffatt F, Rathleff MS, Selfe J, Smith TO, Logan P:  
428 Current management strategies for patellofemoral pain: an online survey of 99 practising UK  
429 physiotherapists. *BMC Musculoskelet Disord* 18:181, 2017.
- 430 42. Sørensen K, Christiansen B: Adolescents’ experience of complex persistent pain. *Scand J*  
431 *Pain* 15:106–12, 2017.
- 432 43. Sprangers MAG, Schwartz CE: Integrating response shift into health-related quality of life  
433 research: a theoretical model. *Soc Sci Med* 48:1507–15, 1999.
- 434 44. Truong LK, Mosewich AD, Holt CJ, Le CY, Miciak M, Whittaker JL: Psychological, social  
435 and contextual factors across recovery stages following a sport-related knee injury: a scoping  
436 review. *Br J Sports Med [Internet]* 54:1149, 2020. Available from:  
437 <http://bjsm.bmj.com/content/54/19/1149.abstract>
- 438 45. Vanier A, Oort FJ, McClimans L, Ow N, Gulek BG, Böhnke JR, Sprangers M, Sébille V,  
439 Mayo N, Group the RSSW: Response shift in patient-reported outcomes: definition, theory,  
440 and a revised model. *Quality of Life Research* 30:3309–22, 2021.
- 441 46. Weiss KE, Hahn A, Wallace DP, Biggs B, Bruce BK, Harrison TE: Acceptance of Pain:  
442 Associations With Depression, Catastrophizing, and Functional Disability Among Children

- 443 and Adolescents in an Interdisciplinary Chronic Pain Rehabilitation Program. *J Pediatr*  
444 *Psychol* 38:756–65, 2013.
- 445 47. Willy RW, Hogleund LT, Barton CJ, Bolgla LA, Scalzitti DA, Logerstedt DS, Lynch AD,  
446 Snyder-Mackler L, McDonough CM: Patellofemoral Pain. *Journal of Orthopaedic & Sports*  
447 *Physical Therapy Journal of Orthopaedic & Sports Physical Therapy*; 49:CPG1–95, 2019.
- 448 48. Winters M, Holden S, Lura CB, Welton NJ, Caldwell DM, Vicenzino BT, Weir A, Rathleff  
449 MS: Comparative effectiveness of treatments for patellofemoral pain: a living systematic  
450 review with network meta-analysis. *Br J Sports Med* , 2020.
- 451 49. EuroQol Research Foundation. EQ-5D-Y User Guide, 2020. [cited 2022 Aug 15]. Available  
452 from: <https://euroqol.org/publications/user-guides>.
- 453
