# Supplementary material for: Quality of life in adolescents with chronic non-traumatic knee pain: An analysis of 323 adolescents with Patellofemoral Pain and Osgood-Schlatter Disease
Source: bioRxiv or medRxiv preprint supplement (doi:10.1101/2023.01.19.23284544), 2023-01-19

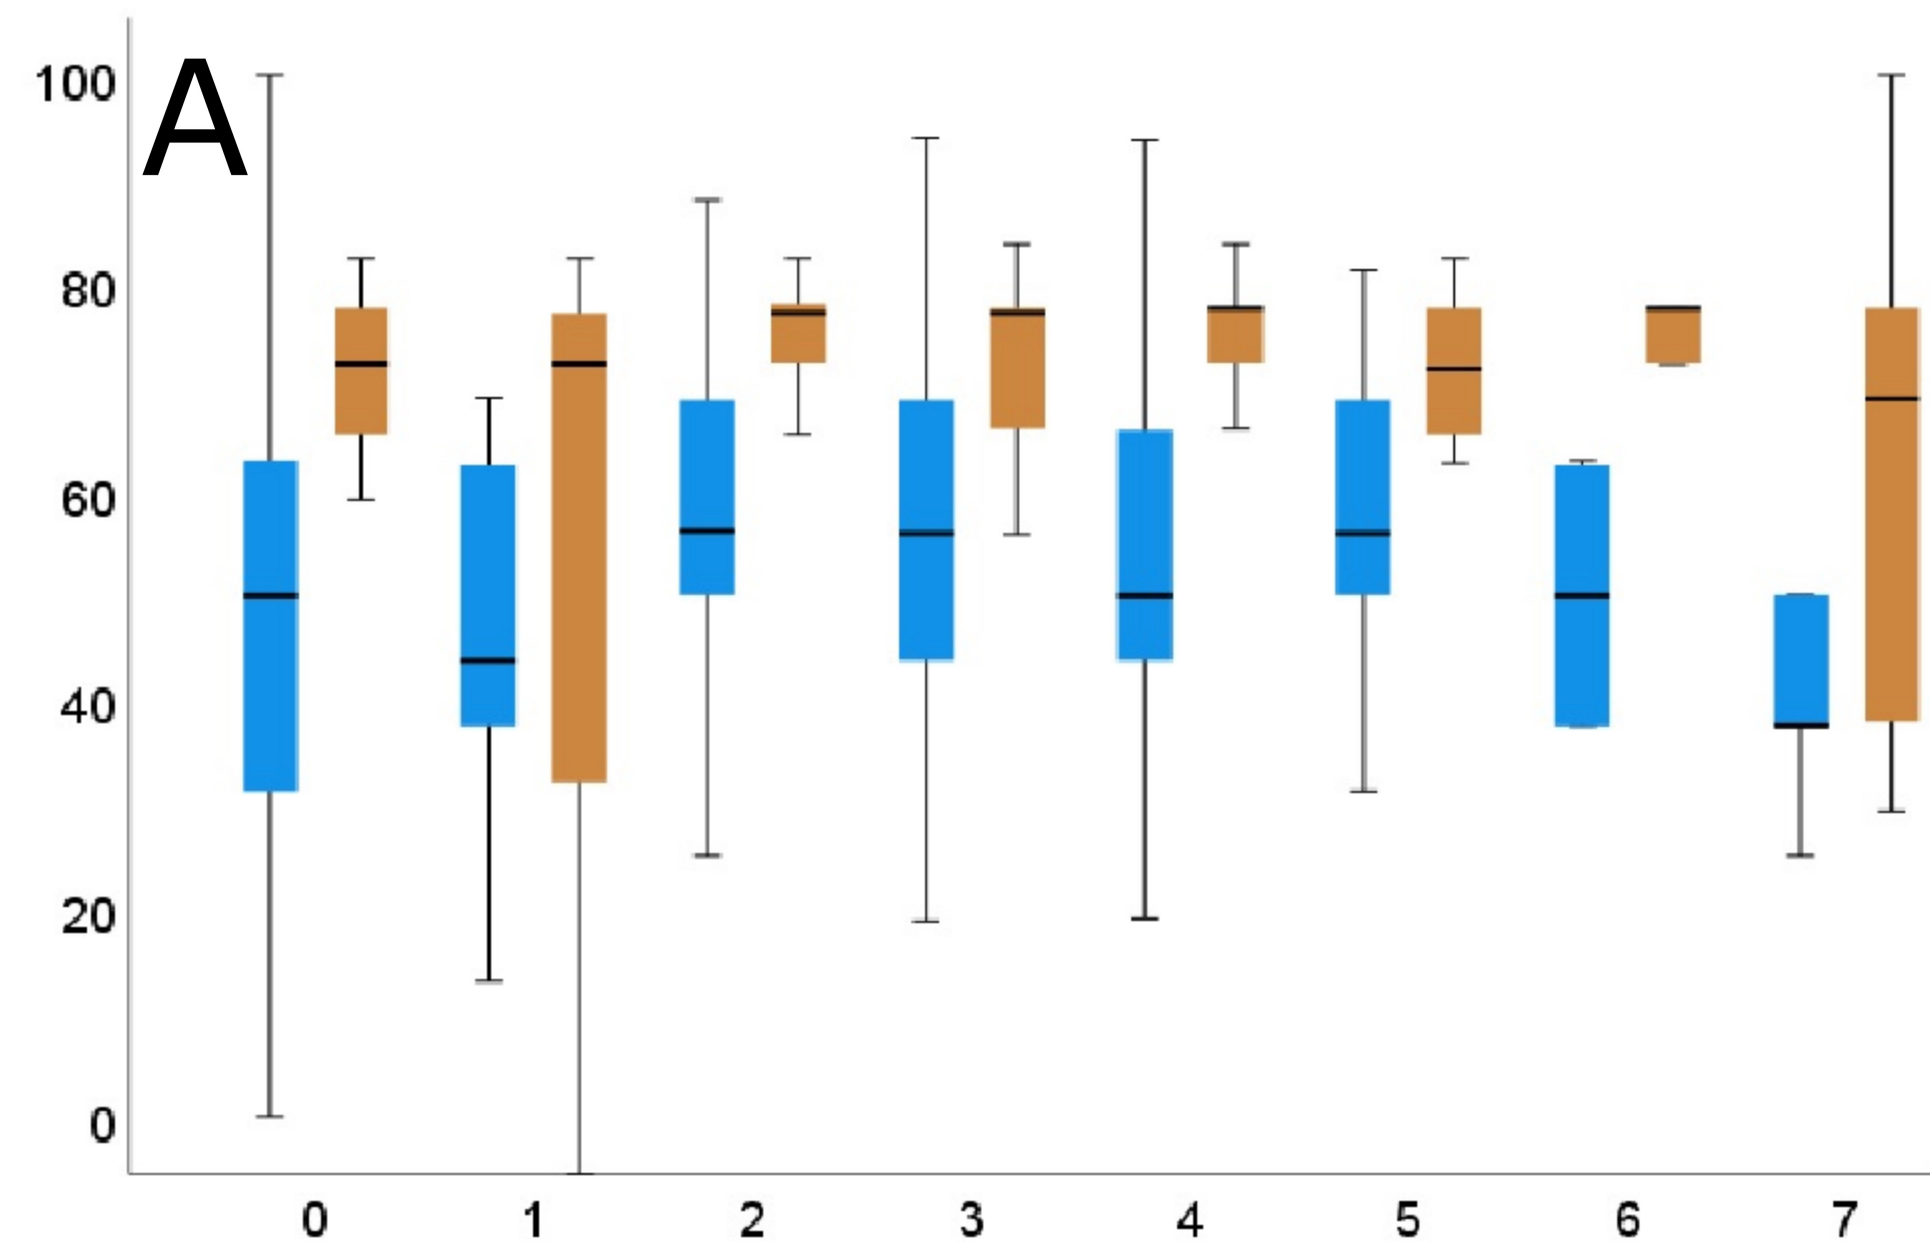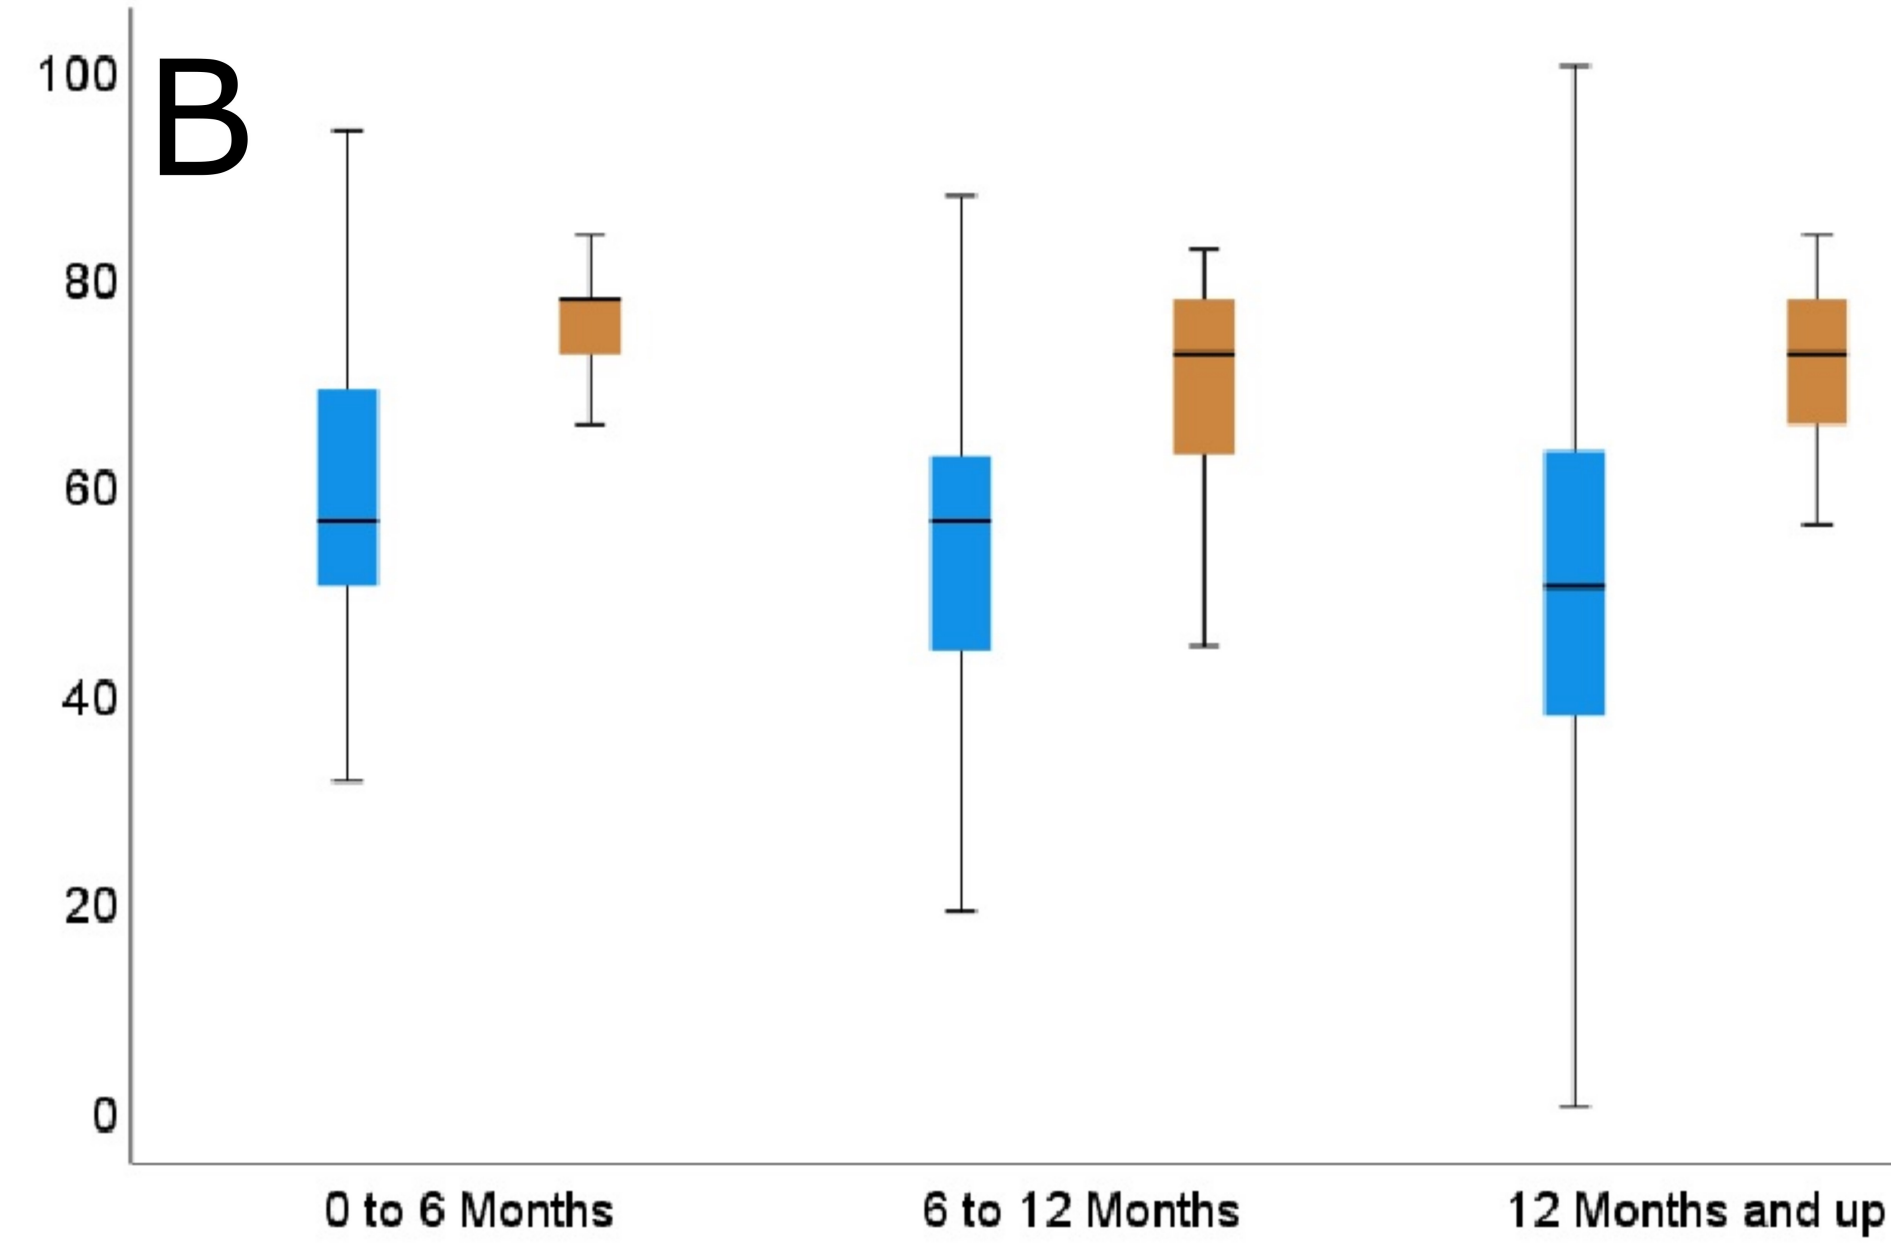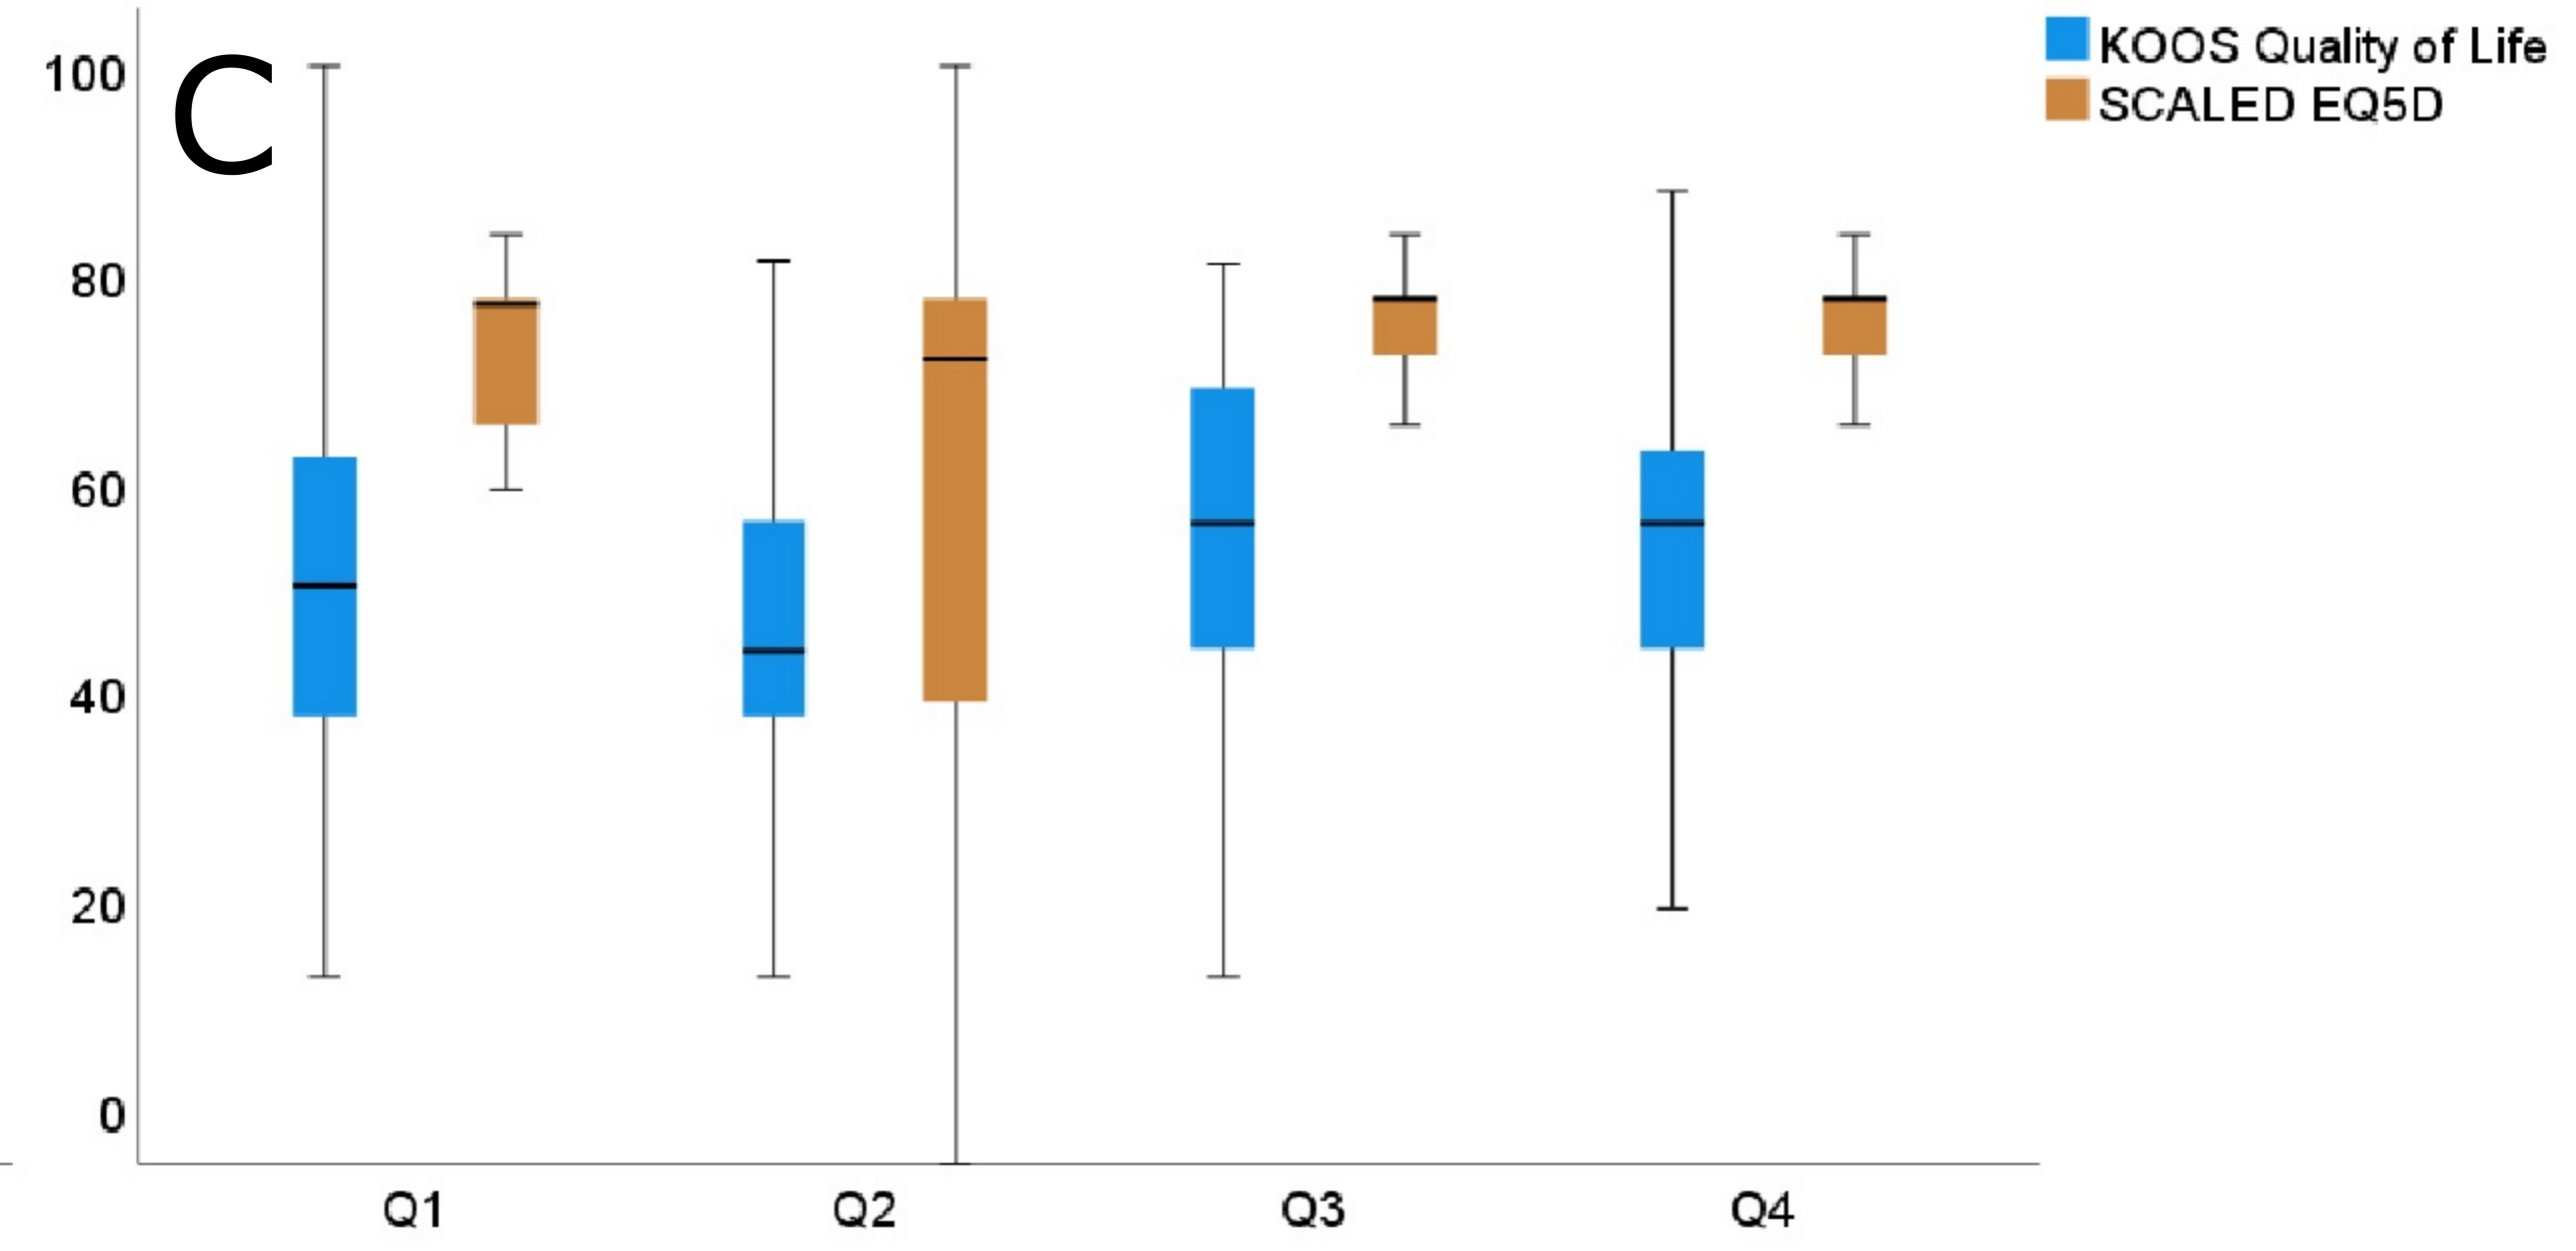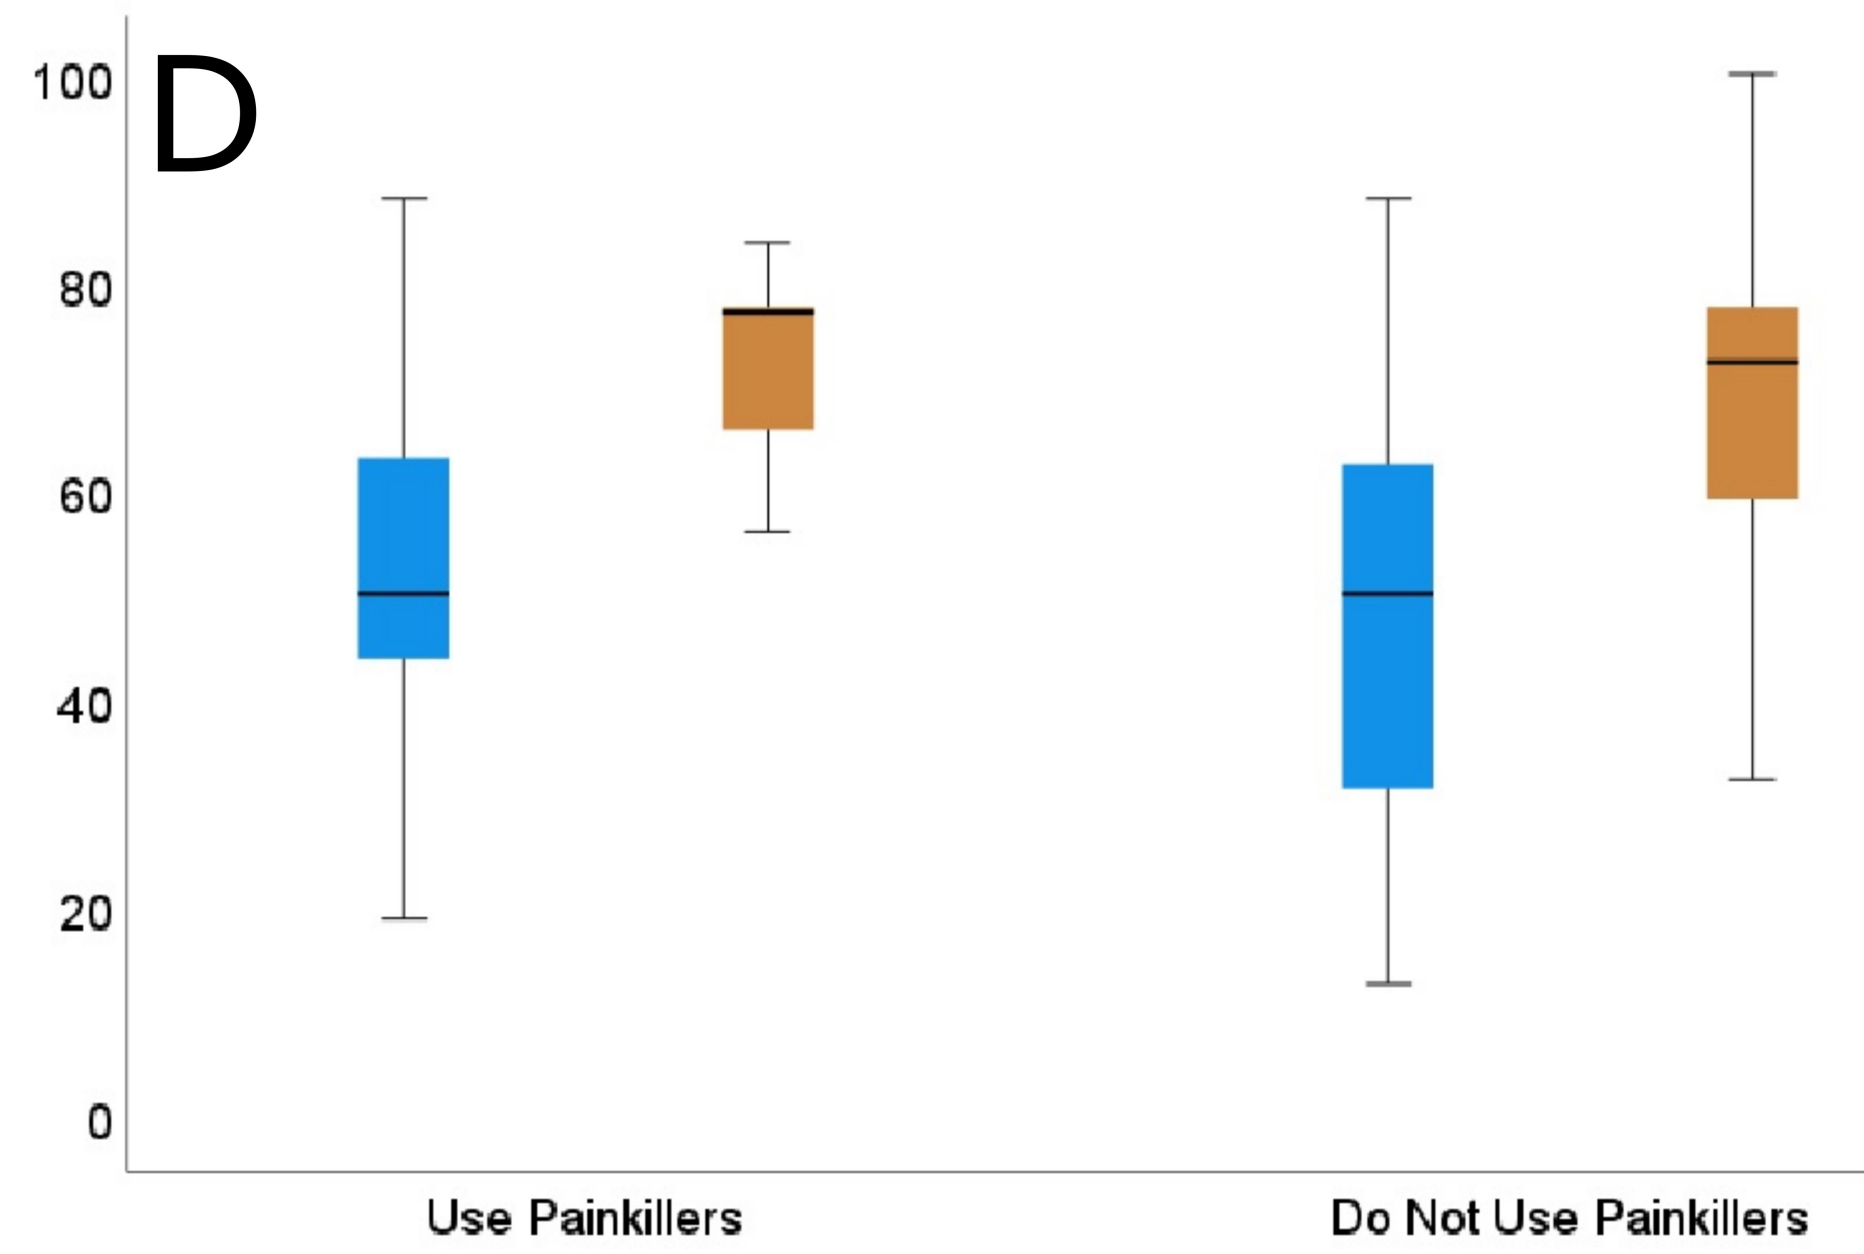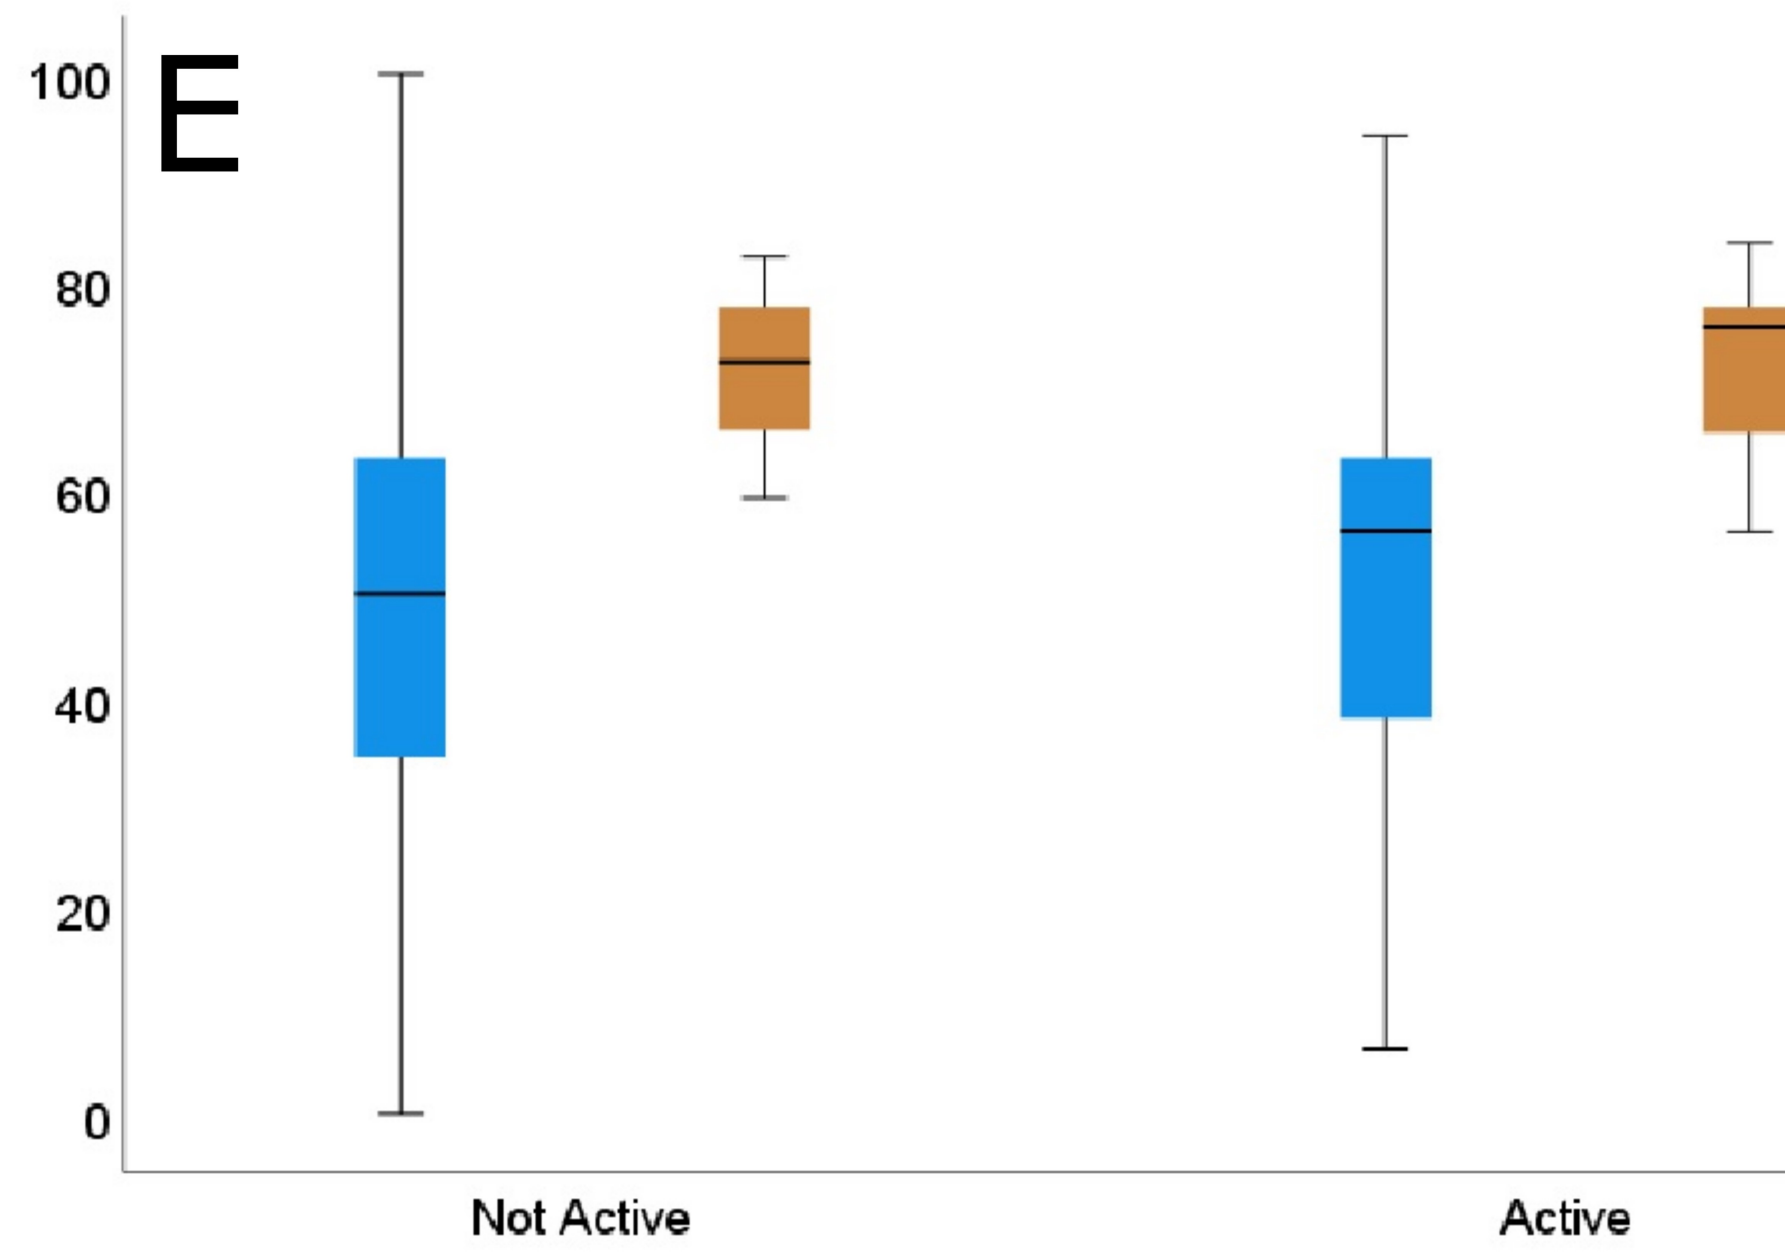

Supplement: Supplementary file [file media-1.pdf]
